# Supplementary material for: Growing resilient futures: agroforestry as a pathway towards climate resilient development for smallholder farmers
Source: Frontiers journal article supplement (doi:10.3389/fsufs.2023.1260291), 2023-11-09
Supplement: Table_1.DOCX [file Table_1.DOCX]

**Supplementary material A: Search strings evolution**

**Appendix A1**. Initial search strings (‘community’ area)

| Agroforestry AND community AND ecosystem stewardship AND smallholder* |
| --- |
| Agroforestry AND community AND inclusion AND smallholder* |
| Agroforestry AND community AND knowledge divers* AND smallholder* |
| Agroforestry AND community AND equity and justice AND smallholder* |

**Appendix A2:** Adjusted search strings

| **Initial search string** | **Adjusted search string** |
| --- | --- |
| Ecosystem stewardship | Ecosystem steward* |
| Inclusion | Inclusi* |
| Equity and justice | Equit* and just* |
| Knowledge divers* | Knowledge diversity |
| Economic and financial | (separated into two search strings) |
| Knowledge and technology | (separated into two search strings) |
| Political | Poli* |
| Socio-cultural | World-view |

**Appendix A3:** Second search strings adjustment

| **Initial search string** | **Adjusted search string** |
| --- | --- |
| Equit* and just* | Fair* |
| Ecosystem steward* | Environment* empower* |
| Community | Communit* |
