# Supplementary material for: Growing resilient futures: agroforestry as a pathway towards climate resilient development for smallholder farmers
Source: Frontiers journal article supplement (doi:10.3389/fsufs.2023.1260291), 2023-11-09
Supplement: Table_2.DOCX [file Table_2.DOCX]

**Supplementary Material B: Focus Group**

**Appendix B1:** Focus group participant information

|  | **Country** | **Intervention in the focus group** | **Expertise** |
| --- | --- | --- | --- |
| **FG1** | Nigeria | Yes | Academia |
| **FG2** | France | Yes | Academia |
| **FG3** | Kenya | Yes | Practitioner |
| **FG4** | India | Yes + chat | Academia |
| **FG5** | Sweden | Yes + chat | Academia |
| **FG6** | Indonesia | Yes | Academia |
| **FG7** | Sweden | Yes | Academia |
| **FG8** | Indonesia | Yes | Academia |
| **FG9** | Indonesia | No + chat | Practitioner |
| **FG10** | Indonesia | No | Academia |

**Appendix B2:** Focus group discussion questions

1. Could this tool be useful in your work and why? Are there other groups you think might benefit from it that we should talk to?
2. How could this tool be more useful to you in the projects you undertake? [Under which conditions could this tool be more useful to you?]
3. Do you see overlaps in the enablers or is something missing?
4. Can you share your experience in using the enablers? Were you able to use multiple enablers at once? What worked and why/ how? What didn't?
