# Supplementary material for: Growing resilient futures: agroforestry as a pathway towards climate resilient development for smallholder farmers
Source: Frontiers journal article supplement (doi:10.3389/fsufs.2023.1260291), 2023-11-09
Supplement: Table_3.DOCX [file Table_3.DOCX]

**Supplementary Material C: Draft tool formulation**

**Appendix C1:** Questions emerging from enabler/arena of engagement interaction

|  | **Equity and justice** | **Inclusion** | **Knowledge diversity** | **Ecosystem stewardship** |
| --- | --- | --- | --- | --- |
| **Political** | Should the issue on the table be the one discussed? | Who is deciding? Is everybody’s voice heard? | What is on the agenda? What is the goal? | What is on the agenda? How are the decisions implemented? |
|  | What’s on the agenda? | Openness of the political scene? (i.e. democracy, dictatorship, repressive power, etc.)/Are farmers directly participating in decision-making? | Are agenda points justified by needs/demands from all or only fuelled by individual wills of power groups? | Who is acting/implementing actions? |
|  | Who is benefiting from the decisions/policies? | Who is benefiting from decisions/policy measures? | Common issue framing? | Are laws and political measures empowering smallholders to protect the environment in which they evolve? |
|  | Is it desirable or harming humans/nature? | Farmers included under which format? [e.g. Representation? Policy co-creation? etc.] |  | Do policy measures/decisions give the opportunity to communities to be empowered to take care of nature? |
|  | What are the powers at play? |  |  |  |
| **Economic/financial** | How desirable is participation in the global economy? (benefits or drawbacks) | How inclusive is the market?/Can farmers easily access the market and sell their products? | Is the integration of different knowledge sources bringing positive economic outcomes? (e.g. increased production/increased benefits?) | Are investments targeting nature conservation? |
|  | How is money used? | Who is producing economic value? (are certain groups excluded?) | Is growth and development seen as a central goal to everyone or are there other framings? (i.e. where not everything is monetisable?) | Is the money invested in training farmers to safeguard the environment/in promoting new (more sustainable) practices/new machinery, tools, and technology? |
|  | What is the purpose of the investment? (benefits to all?) | Who is benefiting from economic value? (are certain groups excluded?) | How is money invested? (i.e. research and development/communication platforms/education...) |  |
|  | Is the investment desirable ? (costs/benefits/risks) | Who has the money?/Who is investing? |  |  |
|  | Does this help improve smallholder's monetary stability? |  |  |  |
| **Ecological** | Is the protection of the environment desirable to all? (i.e. project initiators, NGOs, smallholders, biodiversity?) | Are the benefits of society/nature interaction geared towards everyone? | Is local knowledge about soil, water, pests, sun exposure, external pressures…, taken into account in the protection and action to safeguard the environment? | Are actions geared towards the protection of nature? |
|  | Where does the benefit lie? (i.e. global level, local level?) | Is the action to protect nature beneficial to all? | Is indigenous knowledge well aligned to face the issues in the environment smallholders evolve? | Is nature handled sustainably? (i.e. is nature's exploitation compatible with conservation and future use?) |
|  | Are the actions directed towards protecting the environment also good for people? | Is nature/agricultural lands/forests accessible to all? | Is scientific knowledge weaved in to further develop skills to protect the environment? | Are people participating in (new) sustainable practices? |
|  | Is a change in practice desirable to safeguard the environment? | Are environmental protection projects accessible to all or exclusive with selection criteria, investments, etc.? | What do actors know about nature? (i.e. Is the knowledge overlapping or are there clear gaps?) |  |
| **Knowledge/  technology** | Is knowledge/technology available (physical and financial accessibility)? | Are farmers also involved in the creation of knowledge and technology? | Who is creating knowledge/technology? | Are actors empowered to protect the environment through knowledge and technology? |
|  | Is the information/knowledge intelligible? (i.e. accessible to anyone without prior knowledge or easily understandable) | Whose knowledge is viewed as valid/respected? | Which knowledge/know-hows/skills are used? | Can actors act according to best available technology/practices? |
|  | What is being researched? desirability and importance | Is knowledge/technology inclusion possible or is it protected through patents? | Is knowledge from different actors well weaved? | Is education/upskilling leading to the adoption of practices encouraging ecosystem stewardship? |
|  | Do knowledge and technology bring positive or negative outcomes (i.e. Do we know enough about the technology to apply it or are there potential risks?) | Are knowledge/technology available to everyone or do they require certain pre-existing knowledge or financial capital? | Is the introduction of new technology backed up with the development of new skills to ensure the integration of the technology in new practices? |  |
|  |  | Are knowledge/technology intelligible/user-friendly to everyone or are they exclusive? |  |  |
|  |  | Who decides what needs to be researched/or what technology should be used? |  |  |
| **Socio-cultural** | What is viewed and voiced as important? And is it good for everybody? | Whose view is generally accepted as valid? | Whose values/perceptions are dominating? | Is there awareness of the need to handle the environment in a sustainable way? |
|  | Do these perceptions bring further rights to nature and local communities or are they harming them? | Are less mainstream perspectives considered important (e.g. smallholders world-views/challenges)? | What is considered important? | Are actors willing to handle the environment in a sustainable way? |
|  |  | Is there a mainstream story and does it align with all realities? | How is it represented? | Is the effort of safeguarding the environment seen as relevant? |
|  |  |  | Are perceptions shared or do they differ from one stakeholder group to the other? (i.e. are views aligned or dissenting?) | Are actors putting time into protecting the environment or is time used otherwise? |
|  |  |  |  | Are actors effectively walking the talk of safeguarding the ecosystems? |
|  |  |  |  | What motivates actors to protect the environment? |
| **Community** | Is everybody's voice heard or are there power imbalances? | Are all interested parties participating in the interaction? | Whose views/perspectives is considered important in the interaction? | Is the community empowered to act? |
|  | Is what is being discussed good for everyone? | What enables/hinders participation? | Where does the information used during the interaction come from? | Are individuals empowered to safeguard the environment or the community as a whole? |
|  | Who is benefiting from the interaction? | Are there requirements/criteria/fees to be part of the community/partnership? |  | Is the community adapting its practices to better protect the environment? |
|  | Is a partnership/collaborative work desirable? | Are the interactions contributing to the community or to specific groups only? |  |  |
