# Supplementary material for: Growing resilient futures: agroforestry as a pathway towards climate resilient development for smallholder farmers
Source: Frontiers journal article supplement (doi:10.3389/fsufs.2023.1260291), 2023-11-09
Supplement: Table_4.DOCX [file Table_4.DOCX]

**Supplementary Material D: Literature review information**

**Appendix D1:** Information about selected articles under review

| **Authors** | **Year** | **Title** | **N°** |
| --- | --- | --- | --- |
| Bettles, J., Battisti, D. S., Cook-Patton, S. C., Kroeger, T., Spector, J. T., Wolff, N. H., Masuda, Y., J. | 2021 | Agroforestry and non-state actors: A review | 1 |
| Verburg, R., Rahn, E., Verweij, P., van Kuijk, M., Ghazoul, J. | 2019 | An innovation perspective to climate change adaptation in coffee systems | 2 |
| Valencia, V., García-Barrios, L., Sterling, E. J., West, P., Meza-Jiménez, A., Naeem, S. | 2018 | Smallholder response to environmental change: Impacts of coffee leaf rust in a forest frontier in Mexico | 3 |
| Ghosh-Jerath, S., Kapoor, R., Ghosh, U., Singh, A., Downs, S., Fanzo, J. | 2021 | Pathways of Climate Change Impact on Agroforestry, Food Consumption Pattern, and Dietary Diversity Among Indigenous Subsistence Farmers of Sauria Paharia Tribal Community of India: A Mixed Methods Study | 4 |
| Wartenberg, A. C., Blaser, W. J., Janudianto, K. N., Roshetko, J. M., van Noordwijk, M., Six, J. | 2018 | Farmer perceptions of plant-soil interactions can affect adoption of sustainable management practices in cocoa agroforests: a case study from Southeast Sulawesi | 5 |
| Ajijur Rahman, S., Sunderland, T., Kshatriya, M., Roshetko, J. M., Pagella, T., Healey, J. R. | 2016 | Towards productive landscapes: Trade-offs in tree-cover and income across a matrix of smallholder agricultural land-use systems | 6 |
| Branca, G., Arslan, A., Paolantonio, A., Grewer, U., Cattaneo, A., Cavatassi, R., Lipper, L., Hillier, J., Vetter, S. | 2021 | Assessing the economic and mitigation benefits of climate-smart agriculture and its implications for political economy: A case study in Southern Africa | 7 |
| Ngu, A., Bahar, N. H. A. | 2022 | The potential of timber-agroforestry to meet Sarawak's forestry demand | 8 |
| Budiadi., Susanti, A., Marhaento, H., Ali Imron, M., Permadi, D. B., Hermudananto. | 2019 | Oil palm agroforestry: an alternative to enhance farmers' livelihood resilience | 9 |
| Lagneaux, E., Jansen, M., Quaedvlieg, J., Zuidema, P. A., Anten, N. P. R., García Roca, M. R., Corvera-Gomringer, R., Kettle, C. J. | 2021 | Diversity Bears Fruit: Evaluating the Economic Potential of Undervalued Fruits for an Agroecological Restoration Approach in the Peruvian Amazon | 10 |
| Shiferaw Sida, T., Baudron, F., Hadgu, K., Derero, A., Giller, K. E. | 2018 | Crop vs. tree: Can agronomic management reduce trade-offs in tree-crop interactions? | 11 |
| Sears, R. R., Cronkleton, P. Villanueva, F. P., Miranda Ruiz, M., Pérez-Ojeda del Arco, M. | 2018 | Farm-forestry in the Peruvian Amazon and the feasibility of its regulation through forest policy reform | 12 |
| Goodall, K. E., Bacon, C. M., Mendez, V. E. | 2015 | Shade tree diversity, carbon sequestration, and epiphyte presence in coffee agroecosystems: A decade of smallholder management in San Ramón, Nicaragua | 13 |
| Ayalew, B., Hylander, K., Zewdie, B., Shimales, T., Adugna, G., Mendesil, E., Nemomissa, S., Tack, A. J. M. | 2022 | The impact of shade tree species identity on coffee pests and diseases | 14 |
| Addinsall, C., Glencross, K., Rihai, N., Kalomor, L., Palmer, G., Nichols, D., Smith, G. | 2016 | Enhancing agroforestry in Vanuatu: striking the balance between individual entrepreneurship and community development | 15 |
